# Supplementary material for: Diel Variability Affects the Inorganic Marine Carbon System in the Sea-Surface Microlayer of a Mediterranean coastal area (Šibenik, Croatia)
Source: Copernicus journal article supplement (doi:10.5194/egusphere-2025-2090), 2025-05-16
Supplement: Supplementary file 1 [file egusphere-2025-2090-supplement.pdf]

**Table S 1.** Summary of the Kruskal–Wallis test statistics comparing temperature, salinity, and pH between SML and ULW. (n = sample size;  $\chi^2$  = chi-square statistic (df = 1)).

|                   | <b>Cycle</b> | <b>n</b> | <b><math>\chi^2</math></b> | <b>p-value</b>         |
|-------------------|--------------|----------|----------------------------|------------------------|
| Temperature       | Cycle 1      | 638      | 1.3                        | 0.25                   |
|                   | Cycle 2      | 978      | 2.8                        | 0.10                   |
|                   | Cycle 3      | 978      | 16.1                       | $2.12 \cdot 10^{-10}$  |
| Salinity          | Cycle 1      | 645      | 105.4                      | $<2.20 \cdot 10^{-16}$ |
|                   | Cycle 2      | 996      | 109.5                      | $<2.20 \cdot 10^{-16}$ |
|                   | Cycle 3      | -        | -                          | -                      |
| pH <sub>T25</sub> | Cycle 1      | 630      | 28.9                       | $7.47 \cdot 10^{-8}$   |
|                   | Cycle 2      | 977      | 36.6                       | $1.42 \cdot 10^{-9}$   |
|                   | Cycle 3      | 326      | 2.9                        | 0.08                   |

Table S 2. Summary table with mean values, standard deviation, and n of temperature, salinity,  $\text{pH}_{\text{T25}}$ , and  $\text{pCO}_2$  at SML and ULW for each cycle. In addition, the p-value of the statistical analysis performed when comparing day and night data at each depth is added.

|         |       | Temperature [°C]  |     |                          |               |     |                          | Salinity [g kg <sup>-1</sup> ] |     |                          |              |     |                          |
|---------|-------|-------------------|-----|--------------------------|---------------|-----|--------------------------|--------------------------------|-----|--------------------------|--------------|-----|--------------------------|
|         |       | SML               |     |                          | UWL           |     |                          | SML                            |     |                          | UWL          |     |                          |
|         |       | Mean              | n   | pval                     | Mean          | n   | pval                     | Mean                           | n   | pval                     | Mean         | n   | pval                     |
| Cycle 1 | Day   | 25.66 ± 0.30      | 177 | 1.46 · 10 <sup>-53</sup> | 25.47 ± 0.36  | 177 | 1.27 · 10 <sup>-53</sup> | 38.73 ± 0.14                   | 606 | 3.40 · 10 <sup>-20</sup> | 38.94 ± 0.24 | 606 | 3.36 · 10 <sup>-45</sup> |
|         | Nigth | 24.08 ± 0.43      | 142 |                          | 24.18 ± 0.26  | 142 |                          | 39.12 ± 0.35                   | 426 |                          | 39.41 ± 0.21 | 426 |                          |
| Cycle 2 | Day   | 25.80 ± 0.48      | 312 | 5.47 · 10 <sup>-53</sup> | 25.93 ± 0.55  | 310 | 1.36 · 10 <sup>-61</sup> | 39.18 ± 0.28                   | 972 | 1.49 · 10 <sup>-4</sup>  | 39.34 ± 0.24 | 972 | 1.52 · 10 <sup>-3</sup>  |
|         | Nigth | 24.83 ± 0.26      | 180 |                          | 24.57 ± 0.42  | 176 |                          | 39.26 ± 0.19                   | 559 |                          | 39.41 ± 0.37 | 559 |                          |
| Cycle 3 | Day   | 26.69 ± 0.82      | 365 | 5.91 · 10 <sup>-39</sup> | 26.77 ± 0.78  | 349 | 6.93 · 10 <sup>-21</sup> | NA                             | NA  | NA                       | 38.95 ± 0.29 | 370 | 0.77                     |
|         | Nigth | 24.80 ± 0.94      | 132 |                          | 26.14 ± 0.18  | 132 |                          | NA                             | NA  |                          | 38.93 ± 0.26 | 133 |                          |
|         |       | pH <sub>T25</sub> |     |                          |               |     |                          | pCO <sub>2</sub> [µatm]        |     |                          |              |     |                          |
|         |       | SML               |     |                          | UWL           |     |                          | SML                            |     |                          | UWL          |     |                          |
|         |       | Mean              | n   | pval                     | Mean          | n   | pval                     | Mean                           | n   | pval                     | Mean         | n   | pval                     |
| Cycle 1 | Day   | 8.037 ± 0.026     | 175 | 4.11 · 10 <sup>-4</sup>  | 8.042 ± 0.020 | 189 | 2.69 · 10 <sup>-43</sup> | 514 ± 18                       | 3   | 0.18                     | 525 ± 47     | 3   | 0.18                     |
|         | Nigth | 8.031 ± 0.009     | 140 |                          | 7.993 ± 0.026 | 142 |                          | 416                            | 1   |                          | 465          | 1   |                          |
| Cycle 2 | Day   | 8.025 ± 0.022     | 324 | 7.01 · 10 <sup>-12</sup> | 8.014 ± 0.030 | 321 | 0.01                     | 478 ± 24                       | 4   | 0.64                     | 490 ± 40     | 4   | 1                        |
|         | Nigth | 8.012 ± 0.014     | 184 |                          | 8.011 ± 0.006 | 180 |                          | 477                            | 2   |                          | 469          | 2   |                          |
| Cycle 3 | Day   | 8.032 ± 0.029     | 141 | 6.87 · 10 <sup>-19</sup> | 8.020 ± 0.035 | 129 | 0.75                     | 500 ± 35                       | 4   | 1                        | 522 ± 56     | 4   | 0.64                     |
|         | Nigth | 7.987 ± 0.014     | 53  |                          | 8.013 ± 0.020 | 53  |                          | 500                            | 2   |                          | 508          | 2   |                          |
